# Supplementary material for: Direct ink writing of porous shape memory polyesters
Source: Royal Society of Chemistry journal article supplement (doi:10.1039/d4ma00137k), 2024-01-01
Supplement: d4ma00137k1.pdf [file d4ma00137k1.pdf]

Supplementary Information for

# DIRECT INK WRITING OF POROUS SHAPE MEMORY POLYMERS

Greeshma Raghuvaran<sup>1</sup>, Brandon Nitschke<sup>2</sup>, Courtney Roberts<sup>2</sup>, Melissa Grunlan,<sup>1,2,3</sup> Emily Pentzer\*<sup>1,3</sup>

<sup>1</sup>Department of Materials Science and Engineering, Texas A&M University, College Station, TX 77843, USA.  
E-mail: emilypentzer@tamu.edu; Tel: +1 979 458 6688

<sup>2</sup>Department of Biomedical Engineering, Texas A&M University, College Station, TX 77843, USA.  
E-mail: mgrunlan@tamu.edu; Tel: +1 979 845 2406

<sup>3</sup>Department of Chemistry, Texas A&M University, College Station, TX 77843, USA

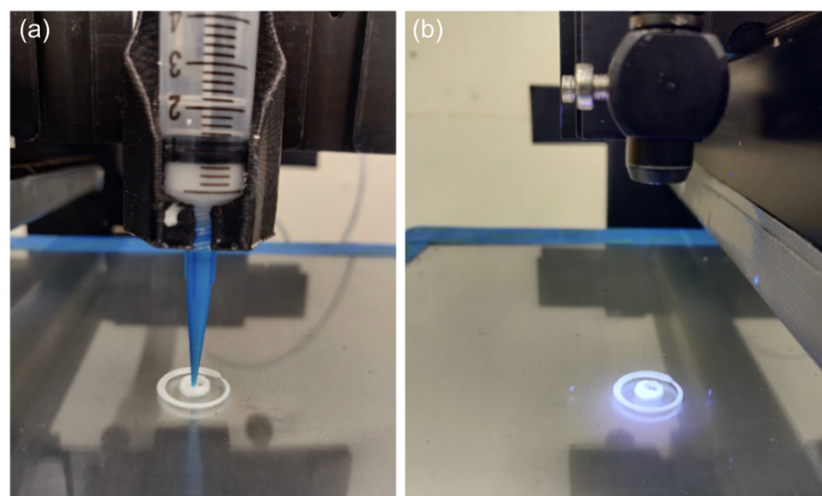

**Figure S1.** DIW Process consisting of (a) extrusion of ink and (b) curing.

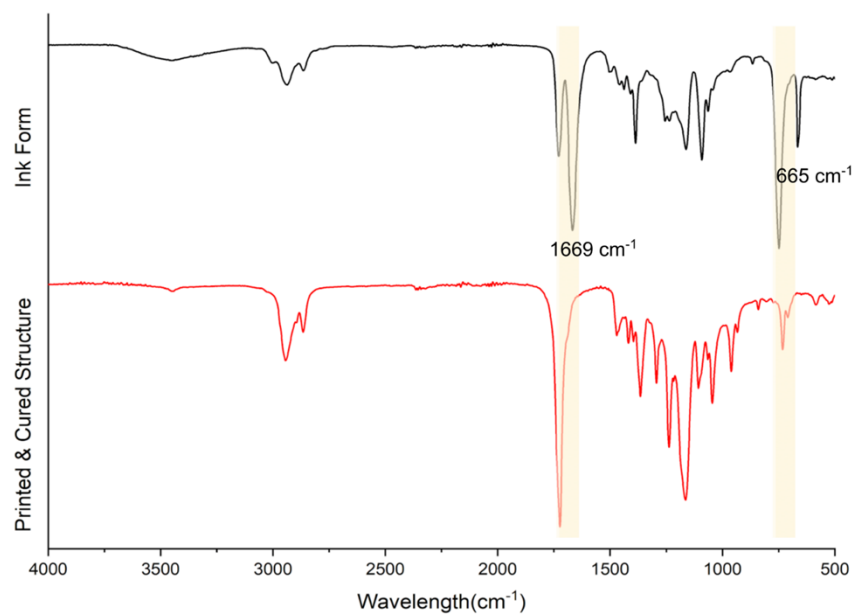

**Figure S2.** Offset FTIR spectra of ink (black trace) and the printed and cured structure (bottom, red trace).

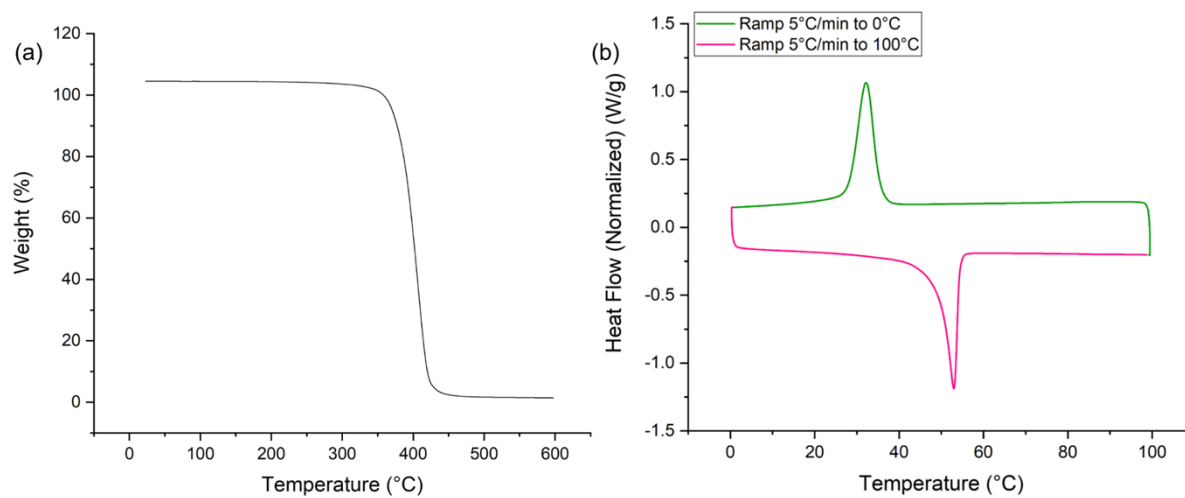

**Figure S3.** (a) TGA weight loss profile, and (b) DSC thermogram of printed and cured structure.

**Table S1.** Weight of samples during the degradation studies.

|        | <b>Sample</b> | <b>Initial Mass</b> | <b>Final Mass</b> | <b>Mass Loss (%)</b> | <b>Average</b> | <b>Std. Deviation</b> |
|--------|---------------|---------------------|-------------------|----------------------|----------------|-----------------------|
| Day 3  | 1             | 0.0127              | 0.013             | -2.362               | 4.334          | 0.605                 |
|        | 2             | 0.0147              | 0.014             | 4.762                |                |                       |
|        | 3             | 0.0128              | 0.0123            | 3.906                |                |                       |
| Day 6  | 1             | 0.0123              | 0.0113            | 8.130                | 12.898         | 4.320                 |
|        | 2             | 0.0145              | 0.0121            | 16.552               |                |                       |
|        | 3             | 0.0157              | 0.0135            | 14.013               |                |                       |
| Day 9  | 1             | 0.0098              | 0.0062            | 36.735               | 29.043         | 6.749                 |
|        | 2             | 0.0156              | 0.0115            | 26.282               |                |                       |
|        | 3             | 0.0141              | 0.0107            | 24.113               |                |                       |
| Day 12 | 1             | 0.0152              | 0.0081            | 46.711               | 45.221         | 2.666                 |
|        | 2             | 0.0141              | 0.0075            | 46.809               |                |                       |
|        | 3             | 0.014               | 0.0081            | 42.143               |                |                       |
| Day 15 | 1             | 0.0129              | 0.003             | 76.744               | 73.252         | 12.924                |
|        | 2             | 0.0151              | 0.0062            | 58.940               |                |                       |
|        | 3             | 0.0113              | 0.0018            | 84.071               |                |                       |
